# Supplementary material for: Bone canonical Wnt signaling is downregulated in type 2 diabetes and associates with higher advanced glycation end-products (AGEs) content and reduced bone strength
Source: eLife. 2024 Apr 10;12:RP90437. doi: 10.7554/eLife.90437 (PMC11006415; doi:10.7554/eLife.90437)
Supplement: Figure 1—source data 1. [file elife-90437-fig1-data1.xlsx]

## Sheet: Foglio1
SOST				DKK-1				LEF-1				WNT10B				WNT5A				COL1A1				GSK3B				AXIN2				BETA-CATENIN				SFRP5
T2D subjects	Non-diabetic subjects			T2D subjects	Non-diabetic subjects			T2D subjects	Non-diabetic subjects			T2D subjects	Non-diabetic subjects			T2D subjects	Non-diabetic subjects			T2D subjects	Non-diabetic subjects			T2D subjects	Non-diabetic subjects			T2D subjects	Non-diabetic subjects			T2D subjects	Non-diabetic subjects			T2D subjects	Non-diabetic subjects
0.019639	1e-07			0.000933				0.007488	0.077052			0.000721156	0.00459311			0.007942	0.0001823			1.58393	14,23104*			1.74554	7,504443*			0.122772	2,335464*			0.001218	0.053689			0.034639	0.007124
0.018595	1e-07			0.0024868	0.004163			0.009917	0.077317			0.000666144	0.000186477			0.014169	0.00752021			4,461068*	4.01645			2.58343				2,181587*	0.015189			2,181587*				0.245519
1.17e-07	1e-07			0.0011046				0.005158	0.023037				0.0011699			0.003038	5.4003e-05			0.588366	0.653496			0.552278	0.0927			0.03885	0.002611			0.03885	0.112672			0,134963*	0.00729
2.43e-05	0,055889*			0.0001685	0.0036114			0.001812	0.032041			6.15544e-05	0.00252726			0.000147	5.1206e-05			0.0711388	1.58491			0.055662	0.007927			0.000625	0.003691			0.589652	0.153584			0.000466	0.002016
2.75e-05	0,043469*				0.0003771			0.002778	0.012876				0.000561665			1.08e-06	0.00084233			0.207655	0.132123			0.729601	0.051255			0.02233	0.016231				0.130519			0.025178	1.19e-05
0.019824	1e-07			0.0017513				0,014002*	0.016777			0.000206773	0.000423423			0.008177	5.4015e-06			0.0519297	0.00975479			0.158318	0.057922			0.011208	0.001194			0.502875	0.021861			0.01419	0.000217
0.014579	0.000131			0.0004705	0.0011822			0.000657	0,000741*			0.000448014	0.000412169			0.019247	0.00601781			0.039738	2.09972			0.213688				0.010548	0.001058			0.073137				0.003829	4.16e-05
0.000422	1e-07				0.0005631				0.001558			9.70752e-05	0.00124212			0.000635	0.0027465			0.0118777	0.327791			0.171612	0.124485			0.016467	0.013778			0.19377	0.204828			0.000244	0.000967
0.013686	1e-07			0.0012351				0.006837					0.000359614			0.003776	0.00117338			0.689171	0.0661222			0.064802	0.02594			0.001104	0.003716			0.055359	0.051434			0.00024	0.003753
0.042732	1e-07			0.0006376	0.0027919				0.002354			0.00100608	0.000264949			0.023079	0.00273344			0.0276799	1.26954			0.000929	0.006801				0.000524			0.126527	0.007808			0.09453	0.000532
2.31e-05	1.9e-06			0.0021947	4.015e-05			4.02e-05	0.001542				0.00285			0.000623	0.00090146			1.25081				0.283688	0.090763			0.002998	0.003286			0,956391*	0.225929			0.000253	0.001189
0.001921	3.16e-05			0.000682				5.1e-05					0.001808			0.000222975	7.8168e-06			1.72545	3.36771			0.315075	0.138462			0,134756*	0.003291			0.012907	0.083916				0.007799
0.018593	1e-07							0.000562				0.00181921	0.000698			0.045925	0.00515147			0.00250934	0,00089068*			0.084463	0.038197			0.003129	0.0134756				0.016504			0.001585
	4.62e-05				0.0018182			0.000468	0.001507			0.000222975	0.00023			0.020011	0.00233337				0,0001477*			0.243409	0.051066			0.00347				0.072155	1,782733*			0.005693
	9.97e-06			0.0001536	0.0001944				0.000539			0.000847	0.002888			0,09067*	0.00419364			0.978664	4.91881			7,504443*	1,001836*				0.022399			0.253434	0.423718				0.005022
	1e-07				0.0024461				0.060374				0.002001			0.006665	0.00095204				4.0235				0.290445				0.0184285			0.051085	0.135353				0.009889
	1e-07								0.001362				0.006747				0.00041969				1.08998				0.001923							0.076374
	5.59e-05				0.0026927				0.025773				0.000475				9.15e-05				0.0254542				0.250754				0.00024				0.002533				7.93e-06
	1e-07				0.0004566				0.000576				0.001005				0.002702				0.470059				0.051556				0.012134				0.127466				0.0008
	1e-07				0.0032254				0.019147								0.000797				0.100382				0.011262								0.056237
	1e-07				0.0038595												0.000533				1.5394				0.0018				0.002333				0.075885				0.000102
																					0.00855596				0.003494				0.003284				0.00763				3.76e-05
																									0.097775				0.003341				0.010956				0.00021
																																	0.055283
