# Supplementary material for: Bone canonical Wnt signaling is downregulated in type 2 diabetes and associates with higher advanced glycation end-products (AGEs) content and reduced bone strength
Source: eLife. 2024 Apr 10;12:RP90437. doi: 10.7554/eLife.90437 (PMC11006415; doi:10.7554/eLife.90437)
Supplement: Figure 2—source data 1. [file elife-90437-fig2-data1.xlsx]

## Sheet: Foglio1
AGEs
T2D	Non-diabetic subjects
482.02	154.08
285.04	196.9
392.84	261.9
358.83	242.01
305.43	214.42
	236.84
	174.07
	213.01
