# Supplementary material for: Bone canonical Wnt signaling is downregulated in type 2 diabetes and associates with higher advanced glycation end-products (AGEs) content and reduced bone strength
Source: eLife. 2024 Apr 10;12:RP90437. doi: 10.7554/eLife.90437 (PMC11006415; doi:10.7554/eLife.90437)
Supplement: Figure 3—source data 1. [file elife-90437-fig3-data1.xlsx]

## Sheet: Foglio1
Fasting glucose levels					Disease duration
T2D	Non-diabetic subjects				T2D
114	91				28
107	83				18
135	83				20
130	107				8
104	86				13
93	86				11
87	92				37
120	112				3
107	92				2
129	96				8
110	100				5
112	87				17
129	93				19
	93				16
	98
	105
	98
	99
