# Supplementary material for: Bone canonical Wnt signaling is downregulated in type 2 diabetes and associates with higher advanced glycation end-products (AGEs) content and reduced bone strength
Source: eLife. 2024 Apr 10;12:RP90437. doi: 10.7554/eLife.90437 (PMC11006415; doi:10.7554/eLife.90437)
Supplement: Figure 4—source data 1. [file elife-90437-fig4-data1.xlsx]

## Sheet: Foglio1
	Young Modulus				Ultimate Strength				Yield Strength
	T2D subjects	Non-diabetic subjects			T2D subjects	Non-diabetic subjects			T2D subjects	Non-diabetic subjects
	25	147.6			3.13	13.03			2.47	8.54
	21.6	53.39			1.97	9.32			1.95	8.87
	14.35	18.84			1.86	2.38			1.7	2.27
	18.62	26.07			2.79	3.09			2.58	4.02
	26.28	27.55			2.9	8.44			2.77	6.03
	31.81	67.87			39.06	8.38			12.33	8.06
	46.77	163.81			12.33	1.79			1.94	7.21
	12.57	3.78			9.24	10.61			7.6	2.92
	9.3	11.19			2.21	7.78				7.12
	20.29	65.92			18.43	4.07				5.95
	33.91	76.24				8				8.8
		83.69				9.05				6.59
		82.45				10				5.4
		145.41				6.65				0.8
		169.68				5.53				6.27
		105.28				1.64				3.18
		16.41				7.73				1.77
		120.31				3.33				6.43
		33.77				1.81
		24.56				6.75
		157.47
